# Supplementary material for: Home Mechanical Ventilation: A Patient’s Perspective Survey Study
Source: MDPI journal article supplement (doi:10.3390/ijerph18084048), 2021-04-12
Supplement: s1 [file s1]

**Table S1.** Modified SERVQUAL questionnaire.

| Assessed Components                                                               | Expected | Perceived |
|-----------------------------------------------------------------------------------|----------|-----------|
| <b>Tangibility</b>                                                                |          |           |
| Assess the material situation in the family                                       |          |           |
| <b>Reliability</b>                                                                |          |           |
| Assess the accuracy of medical services                                           |          |           |
| Assess the will to help the patient and the family in all medical problems        |          |           |
| Assess the personnel's level of keeping calm and quiet                            |          |           |
| Assess the level of care                                                          |          |           |
| <b>Responsiveness</b>                                                             |          |           |
| Assess the rapidity of help                                                       |          |           |
| Assess the response for the patient's requests                                    |          |           |
| <b>Confidence</b>                                                                 |          |           |
| Assess the safety of the patient                                                  |          |           |
| Assess the courtesy of personnel                                                  |          |           |
| Assess the competence of personnel                                                |          |           |
| Assess the availability of a physician                                            |          |           |
| Assess the availability of a nurse                                                |          |           |
| Assess the availability of a physiotherapist                                      |          |           |
| <b>Empathy</b>                                                                    |          |           |
| Assess the respect for the patient                                                |          |           |
| Assess the understanding of the patient's needs                                   |          |           |
| Assess intimacy preservation                                                      |          |           |
| Assess the way of passing on information and the ability to listen to the patient |          |           |
